**An increase in minimum metabolic rate and not activity explains field  
metabolic rate changes in a breeding seabird**

J.A. Green<sup>1\*</sup>, E.J. Aitken-Simpson<sup>2</sup>, C. R. White<sup>3</sup>, A. Bunce<sup>4, 3</sup>, P.J. Butler<sup>5</sup> & P.B.  
Frappell<sup>2,6</sup>

<sup>1</sup>School of Environmental Sciences, University of Liverpool, Liverpool, L69 3GP, UK

<sup>2</sup>Adaptational and Evolutionary Respiratory Physiology, Department of Zoology, La Trobe  
University, Melbourne, Victoria, 3070, Australia

<sup>3</sup>School of Biological Sciences, The University of Queensland, St Lucia, Queensland 4072,  
Australia

<sup>4</sup>School of Life and Environmental Sciences, Deakin University, 221 Burwood Highway,  
Burwood, Victoria, 3125, Australia

<sup>5</sup>School of Biosciences, University of Birmingham, Edgbaston, Birmingham, B15 2TT, UK

<sup>6</sup>*Present address:* School of Zoology, University of Tasmania, Hobart, Tasmania 7001,  
Australia

\*Author for correspondence. Email: [jonathan.green@liverpool.ac.uk](mailto:jonathan.green@liverpool.ac.uk)

Running head: Changes in BMR explain changes in FMR

## Summary

The field metabolic rate (FMR) of a free-ranging animal can be considered as the sum of its maintenance costs (minimum metabolic rate; MMR), and additional costs associated with thermoregulation, digestion, production and activity. However, the relationships between these two quantities and how they relate to behaviour and extrinsic influences is not clear. In seabirds, FMR has been shown to increase during the breeding season. This is presumed to be the result of an increase in foraging activity, stimulated by increased food demands from growing chicks, but few studies have investigated in detail the factors that underlie these increases. We studied free-ranging Australasian gannets (*Morus serrator*) throughout their five-month breeding season, and evaluated FMR, MMR and activity-related metabolic costs on a daily basis using the heart-rate method. In addition we recorded behaviour (flying and diving) simultaneously in the same individuals. FMR increased steadily throughout the breeding season, increasing by 11% from the incubation period to the long chick-brooding period. However, this was not accompanied by either an increase in flying or diving behaviour, or an increase in the energetic costs of activity. Instead, the changes in FMR could be explained exclusively by a progressive increase in MMR. Seasonal changes in MMR could be due to a change in body composition or a decrease in body condition associated with changing allocation of resources between provisioning adults and growing chicks. Our study highlights the importance of measuring physiological parameters continuously in free-ranging animals in order to fully understand the mechanisms underpinning seasonal changes in physiology and behaviour.

Keywords: seabird, gannet, energetics, heart rate method, basal metabolic rate, field metabolic rate, seasonal change

## Introduction

As with other birds, the breeding season of seabirds is the period of the annual cycle where field metabolic rate (FMR) reaches a maximum (Bryant, 1997; Green et al., 2009a). This might be expected, as responsibilities of producing and incubating eggs and of brooding and provisioning young incur costs in addition to those required for the maintenance of the parent birds. However the breeding season is not homogenous and model predictions suggest that the energetic demands on seabird parents will change as eggs hatch and chicks grow larger (Ricklefs, 1983), and environmental conditions vary. The variation in energetic demands during the breeding season has relevance both for understanding prey consumption and ecological bottlenecks at the population level (Green et al., 2007) and implications for limits to metabolism (Welcker et al., 2010). However, despite the relevance of these changing pressures, very few studies have explored variation in metabolic rates and behaviour within a breeding season.

The most likely consequence of eggs hatching and chicks growing larger is that food requirements increase and parents must capture more food during foraging activities (Green et al., 2007). This could be achieved by spending more time foraging as the season progresses (Grémillet, 1997; Lescroël et al., 2010), which will lead to an increase in energy expenditure (Jodice et al., 2003; Mullers et al., 2009). Alternatively, if birds increase their activity-specific metabolic costs they may increase foraging success or efficiency without increasing the time spent foraging (Bevan et al., 1995; Shaffer et al., 2003). Finally, parents may maintain foraging effort, energy expenditure and prey intake and instead reduce the proportion of captured food that they retain for their own maintenance, at the expense of their own body condition (Takahashi et al., 2003).

Those studies which have measured FMR within the breeding season usually suggest that FMR increases from incubation to chick-brooding and chick-rearing (Bevan et al., 2002; Gales and Green, 1990; White et al., 2011). However very few of these have also investigated behaviour simultaneously, in order to determine what underlies the patterns observed. An alternative approach has been to measure behavioural time-budgets throughout the breeding season and combine these with estimates or measurements of energetic costs in order to predict changes in FMR (Grémillet et al., 1995). However these studies have not accounted for the possibility that energetic requirements of parents themselves may vary through the breeding season, independent of the demands of the chicks. For example previous studies have indicated that maintenance costs (minimum

metabolic rate; MMR) which are the equivalent of basal metabolic rate (BMR) in a free-ranging animal (Guillemette et al., 2007) are not fixed and may vary during the annual cycle of birds (Guillemette and Butler, 2012; White et al., 2011). Such changes in MMR can have significant implications for energy budgets and hence behaviour (Green et al., 2005a).

In the present study we measured behaviour and metabolic rate simultaneously and continuously throughout the breeding season in Australasian gannets. By using the heart rate method (Butler et al., 2004; Green, 2011) we were able to estimate not only FMR, but MMR and the energetic cost of activity above maintenance (net metabolic rate; NMR). As with other gannets, Australasian gannets are unusual among seabirds in that the two parents continue to alternate in brooding/guarding and provisioning duties until the chick fledges and the chick is never left unguarded. This allows us to account to an extent for the potentially confounding effect of behaviour, as previous studies suggest that the time budget of Australasian gannets does not change between incubation and chick-rearing (Bunce, 2001). We set out to determine whether the FMR of Australasian gannets changes during the breeding season and if it does, whether this change is due to variation in time-budget, maintenance metabolism or the metabolic cost of activity.

## **Materials and Methods**

### *Study site*

All birds used in the current study were mature adults from the breeding colonies at Wedge Light and Pope's Eye, in the Pope's Eye Marine Reserve (38°16'35' S, 144°41'54" E), located off Queenscliff near the entrance to Port Phillip Bay, Australia. We assumed that there were no sex differences in physiology in this monomorphic species and therefore sex was not considered as a factor in any part of this study. All experiments were carried out with the approval of the La Trobe University animal ethics committee (AEC 04/37L) and appropriate wildlife permits issued by Parks Victoria.

### *Laboratory measurements*

Nine gannets (mean mass  $\pm$  SEM;  $2.31 \pm 0.02$  kg) were brought into the laboratory in January and February 2006. All birds had either failed in their breeding attempt that year or had already fledged a chick. Birds were collected in groups of two or three and transported in ventilated pet carriers by boat to Queenscliff and onwards to La Trobe University in an air-conditioned car (approximately 2 hours total journey time). Once at La

Trobe, the birds were kept in an outside aviary (7.5 m x 5m) which had a sand base, perches, protection from rain and sun and a rectangular pool (2 m x 1.5 m) for bathing and drinking. Birds were kept captive for no more than seven days after which point they were returned to their colonies. During captivity, the birds were hand-fed 300g of pilchards twice daily, supplemented with a daily multi-vitamin tablet. Birds were used once each in two sets of experiments; to examine metabolic changes associated with diel rhythms and exercise and define a calibration relationship between heart rate ( $f_H$ ) and rate of oxygen consumption ( $\dot{V}O_2$ ) (present study) and to examine heat-stress and thermoregulation at high temperatures (Green, Aitken-Simpson & Frappell, unpublished data).

We measured  $\dot{V}O_2$  and rate of carbon dioxide production ( $\dot{V}CO_2$ ) using an open-circuit respirometry system. Animals were placed in a clear Perspex respirometer (45 cm x 70 cm x 62 cm) which was located in a constant temperature (CT) room within which the ambient temperature could be controlled. Air was drawn from the respirometer using a compressor pump (Millipore, USA) at either 12 or 24 L min<sup>-1</sup> and flow rate monitored using an electronic mass-flow meter (Sierra Instruments Inc., USA). A subsample of air was drawn from this main flow using a small aquarium air pump (Rolf C Hagen, UK) and passed through a drying column (Drierite, Hammond, USA) and analyses for the fractional content of O<sub>2</sub> and CO<sub>2</sub> by a combined gas analyser (ADInstruments, Australia). A solenoid valve (Burket, Germany) was used to switch between the respirometer and ambient air samples. Heart rate was monitored using a customised heart rate transmitter and a receiver unit (Polar Electro Oy, Finland). The transmitter was attached dorsally to the feathers using adhesive tape (Tesa, Germany) and custom-made brass electrodes inserted under the skin at the bottom of the neck and base of the spine. A thermocouple was inserted approximately 8 cm into the rectum of the birds to monitor body temperature ( $T_b$ ). The heart rate receiver output, outputs from the gas analyser, flow meter and thermocouples (ambient temperature,  $T_a$  was also recorded continuously) were collected at 100Hz (ADInstruments, Australia) and displayed on a computer using Chart software (ADInstruments, Australia).  $\dot{V}O_2$  was determined from the rate of airflow from the respirometer and the difference in the fractional concentration between ambient and outflowing air. Instantaneous corrections of the gas concentrations were calculated dry at standard temperature (273 K) and pressure (101.3 kPa) using the method of Frappell et al. (1989) assuming a first order linear system (chamber volume 195 L; flow = 12 or 24 L min<sup>-1</sup>; tau = 12.8 or 7.8 determined from a semi-logarithmic plot of concentration against time

following a perturbation,  $r^2 = 0.97, 0.99$  respectively).  $\dot{V}_{O_2}$  was calculated with consideration of RQ related errors (Frappell et al., 1992). Whole system accuracy was determined to be within 6% by bleeding  $CO_2$  into the respirometer at known flow-rate and back-calculating this rate.

Prior to experiments, food (not water) was withheld for 12 hours, sufficient to ensure that the birds were post-absorptive (Laugksch and Duffy, 1986). Birds were equipped with the heart rate transmitter and thermocouple and introduced into the respirometer at ~11:00 with the CT room set to 23°C. The birds were allowed to settle for approximately one hour until  $\dot{V}_{O_2}$  and  $f_H$  had stabilised. They were then used in the thermoregulation experiment for approx 3 hours (Green, Aitken-Simpson & Frappell, unpublished data). After being allowed to settle again for one to two hours, they were then walked at a series of speeds from 0.1 – 1.4 km h<sup>-1</sup>. Birds walked for 3-15 minutes at each speed and had frequent rest periods during which  $f_H$  declined to resting levels. When compared to other species where a similar approach has been used (e.g. Green et al., 2009b), the gannets were relatively reluctant to walk on the treadmill and not all birds would walk at the highest speeds. One bird would not walk at all, and data from this animal were not included in analyses. However instantaneous corrections allowed  $\dot{V}_{O_2}$  and  $\dot{V}_{CO_2}$  to be calculated over relatively short exercise periods of three minutes, which were interspersed with rest periods where  $f_H$  and  $\dot{V}_{O_2}$  returned to pre-exercise levels. This entire ‘activity’ protocol therefore took less than two hours in the late afternoon in each case. After exercise had finished, birds were allowed to rest in the respirometer for approximately 36 hours to record values during ‘inactivity’. During this time the birds were free to rest, preen, sleep or investigate the respirometer at will. The CT room was maintained at 22°C in a photoperiod of 14.5L:9.5D (lights on 05:00 – 19:30) to match conditions in the colony at this time of year. Throughout this period  $f_H$  and  $\dot{V}_{O_2}$  were monitored continuously, with the solenoid automated to switch the gas analyser from excurrent to incurrent (baseline) measurements for five minutes every two hours. Observations of the bird could be made without disturbance via a closed circuit camera system.

### *Laboratory data analysis*

Data from the laboratory were initially processed using Chart software and further analysed using Excel (Microsoft, USA) and Minitab (Minitab Inc., USA). There was no

relationship between body mass and resting  $\dot{V}_{O_2}$  in our data set. As a result, mass corrections were not applied to any data in the present article and all data are presented as ‘whole animal’  $\dot{V}_{O_2}$ . Similarly there was no effect of body mass on either the slope or the intercept of individual relationships between  $f_H$  and  $\dot{V}_{O_2}$ . We assume therefore that body mass does not have any influence on the relationship between  $f_H$  and  $\dot{V}_{O_2}$  (Halsey et al., 2007). Should larger changes in body mass occur during the annual cycle, outside the range measured during calibration, lead to changes in resting  $\dot{V}_{O_2}$ , we assume that these would be accompanied by other physiological adjustments, leading to appropriate changes in  $f_H$  in line with the relationship between  $f_H$  and  $\dot{V}_{O_2}$ . This approach is in line with similar long-term energetic studies of seabirds (Guillemette and Butler, 2012) and is consistent with studies examining year-round changes in the relationship between  $f_H$  and  $\dot{V}_{O_2}$  in species with highly variable body mass (Green et al., 2005b; Portugal et al., 2009). See the recent review by Green (2011) for a full discussion of this issue.

Mean values of  $f_H$ ,  $\dot{V}_{O_2}$  and  $T_b$  were calculated every three minutes throughout the experiments. From these values we calculated grand means for both light and dark values for the 24-hour period commencing at midnight at the end of the first day. To further examine the diel rhythm, mean values of each quantity were also calculated for each of these 24 hours. Resting  $f_H$  and  $\dot{V}_{O_2}$  were defined as the lowest of these hourly values for each animal and resting  $\dot{V}_{O_2}$  was assumed to be equivalent to basal metabolic rate (BMR).

When constructing a calibration relationship between  $f_H$  and  $\dot{V}_{O_2}$ , it is essential that where possible, the collection and analysis of data are used to create a relationship which is analogous to conditions encountered by free-ranging experimental animals (Green, 2011). In the present study, while the birds were free to move in the respirometer during the inactivity period, their large size meant that movement was constrained when compared to other studies which have used these data alone to generate calibration data (e.g. Steiger et al., 2009). As a result, the amount of data recorded while the animals were inactive constituted 97% of the calibration data recorded, which is clearly unrepresentative of the behaviour of free-ranging Australasian gannets, which spend over 40% their time engaged



in foraging activity (Bunce, 2001). To account for this, we could have selected data from the inactive set to combine with data while the birds were active on the treadmill. However rather than discard valuable data, we instead combined the active and inactive data sets and calculated mean  $f_H$  and  $\dot{V}O_2$  in heart rate bins of 10 beats  $\text{min}^{-1}$  for each bird (Storch et al., 1999). Relationships between  $f_H$  and  $\dot{V}O_2$  were constructed using GLM with  $f_H$  as a covariate and gannet identity as a random factor. From initial visual inspection it was clear that the data would not be best described by a linear relationship, thus  $\dot{V}O_2$  data were  $\log_e$ -transformed. Within each bird, some bins had more data points than others (range 1-310) so this variability was accounted for by weighting data in the GLM by the square root of this value. This entire approach allowed us to adopt a 'one-model' approach so that the behaviour of animals in field would not need to be known (Green et al., 2009b; White et al., 2011). This was particularly important in the present study for two reasons. Firstly it meant that it was not necessary to define an unambiguous continuous time-budget for the gannets as this has previously been shown to be impossible with this data set mean (see Green et al., 2009c for details). Secondly, it allowed us to account for the fact that calibration data could not be obtained from flying or swimming birds. We assumed the curvilinear relationship generated by  $\log_e$ -transforming the  $\dot{V}O_2$  data was analogous to the relationships previously obtained walking and swimming great cormorants (*Phalacrocorax carbo*; White et al., 2011) and walking and flying geese (Ward et al., 2002). To account for the possibility that flying gannets had a drastically different relationship between  $f_H$  and  $\dot{V}O_2$  we also conducted a sensitivity analysis (Appendix 1). This allowed us to look at how different trajectories of the relationship which could conceivably occur during flight might affect our findings.

#### Field measurements

As described in more detail previously (Green et al., 2009c), six mature breeding adults (mean mass =  $2.58 \pm 0.05$  kg) were surgically implanted with a custom-built data logger (DL) which recorded heart rate ( $f_H$ ), depth and abdominal temperature ( $T_{ab}$ ; not analysed in the present study). The gannets were selected randomly in September of the 2004-2005 breeding period while incubating their eggs and all six apparently bred normally (Green et al., 2009c), suggesting that as in previous studies, the birds were not negatively affected by the presence of the DL (White et al., 2013). We have previously used this data set to describe activity-specific heart rates and diving behaviour and physiology of this species. In the current study we focus on larger scale changes in behaviour and energy



expenditure. Five of the six data loggers had recordings of  $f_H$  for the full five-month breeding season (mid September – mid February) whereas one unit only recorded until mid October. Regular observations of the colony allowed us to establish laying dates, hatching dates and fledging dates for each breeding attempt by each study animal. Each day of the deployment was therefore categorized as being in one of the following phases: pre-breeding, incubation, chick rearing, winter, failed.

### *Field data analysis*

Periods where the gannets were in flight were identified from data on heart rate for all six gannets, following the procedure outlined by Green et al, (2009c). In brief, 5 min running means of  $f_H$  were calculated for each second of each day. Flight was considered to have occurred when this 5 min mean  $f_H$  was greater than a ‘flight threshold’ value for at least 20 s. Flight  $f_H$  was then calculated as the mean  $f_H$  during the >20 s period when the running mean was greater than the flight threshold. To select the flight threshold value, a range of threshold  $f_H$  values between 160 and 360 beats  $\text{min}^{-1}$  were tested for each individual bird. We then plotted daily flight time as a function of threshold  $f_H$ . Daily flight time decreased with increasing threshold, but in each case, there was a point of inflection where this decrease decelerated, indicating that the appropriate threshold (where  $f_H$  rapidly increased due to flight) had been identified. For example, for Bird #112, below 240 beats  $\text{min}^{-1}$ , a 20 beats  $\text{min}^{-1}$  change in threshold  $f_H$  resulted in a 2 h change in total daily flight time, whereas the same change in threshold above 240 beats  $\text{min}^{-1}$  resulted in a 0.5 h change in total daily flight time. The flight threshold was either 220 (#110, #135, #535) or 240 (#112, #244, #292) beats  $\text{min}^{-1}$ . The time spent in flight was calculated for each gannet for each day. The mean of these values gave the daily time in flight (DTF) for each day of the breeding season. Diving data were available from four individuals (#112, #135, #292, #535) as previously described (Green et al., 2009c). In the current study we calculated the total time submerged and number of dives for each gannet for each day. The mean of these values gave the daily time submerged (DTS) and daily number of dives (DND) for each day of the breeding season.

To estimate metabolic rate, mean  $f_H$  was calculated every three minutes, to match the recording interval in the laboratory calibration procedure, for each animal in the field. Estimates of  $\dot{V}O_2$  for these three minute periods were then made using the calibration relationship. The standard error of the estimate (SEE) for these estimates were calculated using the procedure outlined by Green et al. (2001), which accounts for all of the error

inherent in the calibration process. For some analyses, we converted  $\dot{V}O_2$  to metabolic rate using a factor of  $18.7 \text{ kJ [l O}_2\text{]}^{-1}$  assuming that the gannets had a diet composed predominantly of fish of the same nutritional composition as sardines (Frankel and Smith, 1998; Green et al., 2006). Timing of sunrise and sunset at Pope's Eye was calculated using data from Geoscience Australia (<http://www.ga.gov.au/geodesy/astro/sunrise.jsp>). Mean  $f_H$  and hence estimated  $\dot{V}O_2$  and field metabolic rate (FMR) were calculated for each day of the summer breeding period, the entire summer breeding period and for each phase of the breeding season. In the case of the different phases there were only sufficient data to evaluate the two main phases, incubation and chick-rearing. Estimates of  $\dot{V}O_2$  or MR cannot be treated as parametric data as this would ignore the residual error associated with the calibration process (Green, 2011). Thus estimates of  $\dot{V}O_2$  or MR ( $\pm$  SEE) were compared using the proximate normal test, paired where appropriate.

As well as calculating FMR for each day, we also calculated minimum metabolic rate (MMR) for each day of the breeding season (see Guillemette and Butler, 2012; Guillemette et al., 2007). To do this we derived a 15 minute running mean of  $f_H$  and used the lowest value of this quantity each day to estimate  $\dot{V}O_2$  and metabolic rate. Net metabolic rate (NMR; total metabolic costs above resting) was calculated by subtracting MMR from FMR for each day (e.g. Guillemette et al., 2007; Ricklefs et al., 1996; White et al., 2011). In doing so we assume that MMR and NMR are additive components of FMR, due to strong support for a positive Pearson's correlation in our data set between MMR and FMR ( $P < 0.001$ ) and lack of support for a correlation between MMR and NMR ( $P = 0.06$ ). This agrees with findings from the great cormorant (White et al., 2011) and supports Ricklefs' 'partitioned pathways' model of energy metabolism (Ricklefs et al., 1996).

Changes in metabolic measurements (FMR, MMR & NMR) and behavioural measurements (DTF, DTS & DND) over time during the breeding season were checked for normality and analysed using regression analysis, weighted by the inverse square root of SEE or SEM, where days since September 1<sup>st</sup> 2004 was the independent variable and measurement (FMR, MMR, NMR, DTF, DTS and DND) was the dependent variable. Relationships between date and FMR and MMR were compared using general linear model with measurement (FMR or MMR) as a fixed factor and days since 1<sup>st</sup> September 2004 as a covariate. For all these analyses, mean FMR, MMR, NMR, DTF, DTS and DND were calculated for 14 day intervals to control for the effects of serial autocorrelation in

time-series data. The value of 14 days was determined by correlating residual values for successive days until the correlation was no longer significant which occurred at interval of 14 days. In all statistical testing we have followed the advice of Sterne and Smith (2001) in the interpretation of P values.

## Results

### *Relationship between heart rate and rate of oxygen consumption*

Heart rate ( $f_H$ ) and rate of oxygen consumption ( $\dot{V}O_2$ ) varied among individuals and between active and inactive periods (Table 1). Birds only walked at moderate speeds (mean  $\pm$  SEM:  $0.5 \pm 0.05 \text{ km h}^{-1}$ ) but  $f_H$  was still 2x greater and  $\dot{V}O_2$  3.5x greater than while the birds were inactive (Table 1). The calibration relationship between  $f_H$  and  $\dot{V}O_2$  was best described by an exponential function (Fig. 1). There was strong support for both  $f_H$  ( $F_{(1, 123)} = 607.5$   $P < 0.001$ ) and gannet identity ( $F_{(7, 123)} = 8.74$   $P < 0.001$ ) having a significant effect on  $\dot{V}O_2$  and the effect of gannet ID was taken into account when calculating SEE (Green et al., 2001). The range of  $f_H$  in the calibration relationship (58 – 275 beats  $\text{min}^{-1}$ ) encompassed 85% of the distribution of  $f_H$  measured in the free-ranging birds (Fig. 1). We conducted a sensitivity analysis to explore the effects of extrapolation of the calibration relationship beyond this range (Appendix 1). The analysis suggests that even if this extrapolation was not valid, none of the results or conclusions from the present paper would be changed (Appendix 1).

### *Diel Pattern & Minimum Values*

There was strong evidence that in the laboratory,  $f_H$ ,  $\dot{V}O_2$  and  $T_b$  were all greater during the day than during the night (Fig. 2, Table 2; Paired t-Tests:  $t_{(7,7,5)} = 5.2, 6.2, 5.5$   $P < 0.001$ ). Hourly values of  $f_H$  and  $\dot{V}O_2$  for the diel cycle were calculated for the free ranging animals during the period coinciding with the same time of year as laboratory calibrations (late January – early February). In the free-ranging birds, a more exaggerated pattern of variation was observed (Fig. 2). Again, there was strong evidence that both  $f_H$  (Paired t-Test:  $t_{(4)} = 5.1$ ,  $P < 0.01$ ) and  $\dot{V}O_2$  (Proximate Normal Test:  $Z = 17.9$ ,  $P < 0.001$ ) were greater during the day than during the night (Table 2). The  $f_H$  and hence  $\dot{V}O_2$  of free-ranging birds was high around sunrise but highest around sunset.

For most individuals in the laboratory, resting  $f_H$  and  $\dot{V}O_2$  (minimum hourly value) were recorded during the night. Mean resting  $f_H$  was  $69 \pm 3$  beats  $\text{min}^{-1}$ . Mean resting  $\dot{V}O_2$  was  $12.1 \pm \text{ml min}^{-1}$ , equivalent to a basal metabolic rate of  $3.8 \pm 0.4$  W.

### Field data

Field metabolic rate (FMR) for the entire study period was  $25.5 \pm 2.7$  W. If the phases are considered separately, then FMR during chick rearing ( $25.8 \pm 2.9$  W) was 11% higher than FMR during Incubation ( $23.2 \pm 2.6$  W), a result for there was strong statistical support (Proximate Normal Test:  $Z = 3.82$ ,  $P < 0.001$ ). Fig. 3 shows how FMR, NMR and MMR varied during the breeding season. A steady increase in FMR throughout the breeding season appears to be driven primarily by a clear increase in MMR with additional variability in FMR due to inconsistent variability in NMR. These observations are supported by weighted regression analyses when the data were calculated for two week intervals (Table 3). There was very strong support for a significant increase in MMR over time and little support for a change in NMR. Put together, these appear to give strong support for a significant increase in FMR as the breeding season progressed. When the relationships of FMR and MMR against time were compared, there was no evidence for a difference in slope ( $F_{(1,17)} = 2.2$ ,  $P = 0.15$ ), suggesting that NMR was a constant additive factor and that the increase in FMR was due to the increase in MMR.

There was considerable day-to-day variability in the amount of time that the gannets spent in flight and the number of dives performed (Figure 4). This variability is likely to drive the day-to-day variability in NMR (Figure 3b). The gannets spent a mean of  $4.7 (\pm 0.5)$  hours in flight per day for the duration of the breeding season, performed a mean of  $25 (\pm 8)$  dives per day and spent a mean of  $82 (\pm 24)$  seconds per day submerged during diving. Weighted regression analysis did provide any support for consistent changes in these behaviours as the breeding season progressed (Table 3).

### Discussion

Close examination of the data in the present study reveals day-to-day variability in both field metabolic rate (FMR) and time allocation to activities such as flying and diving (Figs 3&4). Unfortunately with the data available in the present study, we could not resolve individual foraging trips and assign a complete time budget of activity for our birds (Green et al., 2009c). In future studies it would be interesting to look in detail at what governs day-

to-day activity and energy expenditure in seabirds. Despite this, it is clear that the FMR of Australasian gannets increased during the breeding season. This increase was due solely to an increase in minimum metabolic rate (MMR), as overall there was no change in either the amount, or the energetic cost of foraging activity (NMR). Our findings illustrate the diversity of energetic strategies used by seabirds during the breeding season and once again highlight the importance of making physiological measurements in wild and free-ranging animals.

#### *Breeding season energetics*

A small number of studies have measured FMR of seabirds, at different stages of their breeding season (e.g. Chappell et al., 1993; Gales and Green, 1990; Moreno and Sanz, 1996). These studies have tended to demonstrate an increase in FMR, associated with an assumed or demonstrated increase in the proportion of time spent foraging (e.g. Bech et al., 2002). A key transition occurs in many species when chicks are left unattended and parents devote more time to foraging (Bevan et al., 2002; Bevan et al., 1995). These changes in time-budget can be further magnified by variation in activity-specific energetic costs between phases of the breeding season. For example the metabolic rate of black-browed albatrosses (*Thalassarche melanophrys*) foraging at sea increased by 27% from chick-brooding to chick-rearing (Bevan et al., 1995). Similarly, the metabolic rate during foraging of wandering albatrosses (*Diomedea exulans*) increased by 10% from incubation to chick-brooding, thought to be a response to maximising the rate of food delivery to chicks (Shaffer et al., 2003).

Other studies have found that the energy expenditure of seabirds is essentially constant between chick-brooding periods and chick-rearing periods (Green et al., 2007). In the case of female macaroni penguins (*Eudyptes chrysolophus*), this was despite an increase in the proportion of time spent foraging from chick-brooding to chick-rearing, suggesting a decrease in metabolic rate during foraging to compensate for the previously demonstrated increase in metabolic rate while on-shore (Green et al., 2002). For macaroni penguins, it is suggested that FMR remained constant between breeding season phases at a common optimal level (Green et al., 2009a). Indeed it is often stated that FMR during the breeding season represents both a maximum and an 'optimal working capacity' and that increased energy expenditure above this 'ceiling' might have a detrimental effect on lifetime reproductive success (Drent and Daan, 1980). The present study and other studies which have demonstrated that FMR during the breeding season may not have one single value,

and tends to increase as breeding seasons progress, reinforce the need to refine and improve our thinking on what we mean by concepts such as this and ‘maximum sustainable rates’.

Our study showed that FMR can increase during the breeding season without an increase in either activity levels (foraging effort in terms of time spent flying and diving) or the energetic cost of activity. Indeed our findings suggest that increases in metabolic rate during foraging trips between breeding season phases (see above) may not be due to an increase in effort, but rather due to an increase in MMR as a component of FMR. Further evidence to support this comes from increases in metabolic rates when ‘inactive’ at the nest as the breeding season progresses. Such increases have been shown from incubation to chick-brooding in black-browed albatrosses (Bevan et al., 1995), from chick-brooding to chick-rearing in macaroni penguins (Green et al., 2002) and from incubation/brooding to chick-rearing in gentoo penguins (*Pygoscelis papua*) (Bevan et al., 2002). In free-ranging eider (*Somateria mollissima*), energetic costs associated both with wing moult and during winter were also associated with changes in MMR while birds are inactive on water, rather than changes in activity (Guillemette and Butler, 2012; Guillemette et al., 2007). All of these findings call into question the combination of energetic costs from one stage of the season with a varying time-budget in order to estimate energetic costs throughout the breeding season (Grémillet et al., 1995), or even throughout the year (Gales et al., 1993; Shaffer, 2004). The present study (and indeed some of the other studies mentioned) suggests that this approach may be inappropriate since FMR can vary independently of behaviour, due to changes in MMR.

While we have shown that increases in FMR in Australasian gannets are not due to an increase in foraging effort, they must still meet the demands of growing chicks as the breeding season progresses and the increase in MMR must be fuelled from energy intake or reserves. In macaroni penguins where FMR remained constant, changing demands from chicks were met by changes in the allocation of captured food to chicks, with the consequence that parent body mass decreased (Green et al., 2007). This buffering of chick demands with adult body condition has been shown previously in seabird species (Takahashi et al., 2003). For example individual Adélie penguins (*Pygoscelis adeliae*) which accumulate, then use, large body reserves have high breeding success (Ballard et al., 2010). We did not explicitly measure body mass changes in the present study and there are no data on body mass changes in Australasian gannets during the breeding



season. However in the present study, the body mass of the birds used in the laboratory measurements in January and February 2006 was 10.5% less than that of the birds implanted with data loggers in the field in September 2004, a difference with strong statistical support ( $t$ -test,  $t_{(13)} = 5.73$ ,  $P < 0.001$ ). Furthermore in the closely-related Cape gannet (*Morus capensis*), body mass of birds sampled during chick-brooding was 8.5% lower than birds sampled one month earlier during incubation (Adams et al., 1991). Previous studies of Australasian gannets at Pope's Eye suggest that when food availability is limited, older and more experienced breeders may be better able to allocate resources to maintain parental care, suggesting that judicious allocation of resources is important in maintaining breeding success (Bunce et al., 2005). A decrease in body mass might be expected to lead to a decrease in the metabolic cost of flight, whereas our data suggest no change in the metabolic costs of activity. However, this saving could be compensated for by, for example, an increase in food loads for growing chicks. As mentioned above, we could not reliably assign metabolic costs to specific activities in the present study, but this is a priority for our future work in this field.

#### *Seasonal change in MMR*

In Australasian gannets FMR increased during the five-month long breeding season as the result of a progressive increase in MMR. We consider whether the increase in MMR could be an artefact of decreasing cardio-vascular organ mass leading to a decrease in oxygen pulse and hence changes in the relationship between  $f_H$  and  $\dot{V}O_2$ . However, if this was the case, it would also affect the animals during activity, and hence our estimate of NMR would necessarily also have to be higher. Given that neither activity levels nor NMR changed, this seems not to be the case. We can be confident then in our estimate that MMR was 25% higher during chick-rearing than during incubation. The use of minimum, resting or basal metabolic rate has received much attention in recent times (e.g. McKechnie, 2008; McNab, 2009; White et al., 2007). Many of these studies have assumed that these quantities or traits have single, unchanging values that are constant within an individual, assuming standardised measurement conditions have been met (McNab, 1997). However, a growing body of work is demonstrating that among birds at least, there can be considerable variability and flexibility in these rates (McKechnie, 2008; Swanson, 2010). For example, BMR is elevated in winter when compared to summer in many small temperate species (Swanson and Olmstead, 1999), but may be elevated in summer when compared to winter in subtropical desert birds (Smit and McKechnie, 2010). In eider, MMR showed considerable variation in the seven months following hatching, possibly as a



strategy to compensate for higher locomotion activity (Guillemette and Butler, 2012). The only study to estimate MMR continuously for an entire annual cycle showed considerable variability in the MMR of a seabird, the great cormorant (White et al., 2011). In this species, MMR also tended to increase during the breeding season and was higher in winter than in summer. As in the present study, changes in MMR were closely associated with changes in FMR (White et al., 2011). The present study shows that changes in MMR are important for understanding what governs seasonal change in FMR, which may in turn be important for understanding seasonal variation in prey requirements (Bunce, 2001). A previous study of macaroni penguins showed that an increase in diving capacity could be explained by seasonal reduction in MMR during winter (Green et al., 2005a).

So what causes the progressive increase in MMR during the breeding season of Australasian gannets? While we did not set out to determine the mechanism in this study, a number of factors can be considered. In macaroni penguins, improvements in insulation and increases in water temperature were suggested to be responsible for the decrease in MMR (Green et al., 2005a). In Australasian gannets, a progressive reduction in the insulating properties of feathers during the breeding season as feathers become increasingly worn and damaged could lead to an increase in MMR, as could a progressive decrease in insulation from subcutaneous fat associated with body mass reduction (see above). However in the warm summer conditions encountered at the breeding colony where gannets rarely approach their lower critical temperature (Green, Aitken-Simpson & Frappell, unpublished data), this mechanism seems unlikely. Breeding black-legged kittiwakes (*Rissa tridactyla*) also showed changes in both BMR and FMR during their breeding season, though in this case while FMR increased from incubation to chick-rearing, BMR decreased (Bech et al., 2002). The decrease in BMR was thought to be associated with a disproportionate decrease in the size of organs with high intrinsic metabolic rates such as liver and kidney, possibly as an adaptive strategy to reduce energetic costs, or in response to a requirement for more undigested food to be transferred to chicks. In Australasian gannets, MMR increased during the breeding season so this exact mechanism cannot be invoked, however changes in the mass and/or activity of internal organs could underlie changes in MMR. A decline in body condition could be associated with an increase in stress as indicated by the hormone corticosterone, as has been shown in other seabirds (Kitaysky et al., 1999), including closely-related boobies (Lormée et al., 2003). Increased corticosterone has been associated with an increase in metabolic rate in some species (Palokangas and Hissa, 1971), but not all (Buttemer et al.,

1991), though there has been little work to define the presence or absence of an association.

Finally, as well as demonstrating the fact that minimal, resting or basal metabolic rates are not a fixed concept and can vary seasonally, presumably with the 'state' of the animal, our data show the importance of measuring metabolic rates in the field. MMR in the field was approximately twice that of BMR measured in the laboratory, suggesting once again that while BMR measured in the laboratory may be a repeatable trait, it may have little relevance to the conditions and extrinsic factors which govern minimum metabolism in free-ranging animals (Hulbert and Else, 2004).

## Acknowledgements

The authors would like to thank Tanya Pyk for assistance while collecting the gannets. Tony Woakes assisted with the data loggers. We are grateful for the comments of three anonymous reviewers who helped us to clarify important points.

## Funding

This work was funded by the Deakin University Central Research Grant Scheme awarded to AB. Support for JG came from a La Trobe University Postdoctoral Fellowship.

## References

- Adams, N. J., Abrams, R., Siegfried, W. R., Nagy, K. and Kaplan, I. (1991). Energy expenditure and food consumption by breeding Cape gannets *Morus capensis*. *Marine Ecology Progress Series* **70**, 1-9.
- Ballard, G., Dugger, K. M., Nur, N. and Ainley, D. G. (2010). Foraging strategies of Adélie penguins: adjusting body condition to cope with environmental variability. *Marine Ecology Progress Series* **405**, 287-302.
- Bech, C., Langseth, I., Moe, B., Fyhn, M. and Gabrielsen, G. W. (2002). The energy economy of the arctic-breeding Kittiwake (*Rissa tridactyla*): a review. *Comparative Biochemistry and Physiology A* **133**, 765-770.
- Bevan, R. M., Butler, P. J., Woakes, A. J. and Boyd, I. L. (2002). The energetics of gentoo penguins, *Pygoscelis papua*, during the breeding season. *Functional Ecology* **16**, 175-190.
- Bevan, R. M., Butler, P. J., Woakes, A. J. and Prince, P. A. (1995). The energy expenditure of free-ranging black-browed albatrosses. *Philosophical Transactions of the Royal Society of London* **350**, 119-131.
- Bryant, D. M. (1997). Energy expenditure in wild birds. *Proceedings of the Nutrition Society* **56**, 1025-1039.
- Bunce, A. (2001). Prey consumption of Australasian gannets (*Morus serrator*) breeding in Port Philip Bay, southeast Australia, and potential overlap with commercial fisheries. *ICES Journal of Marine Science* **58**, 904-915.

- Bunce, A., Ward, S. J. and Norman, F. I. (2005). Are age-related variations in breeding performance greatest when food availability is limited? *Journal of Zoology* **266**, 163-169.
- Butler, P. J., Green, J. A., Boyd, I. L. and Speakman, J. R. (2004). Measuring metabolic rate in the field: the pros and cons of the doubly-labelled water and heart rate methods. *Functional Ecology* **18**, 168-183.
- Buttemer, W. A., Astheimer, L. B. and Wingfield, J. C. (1991). The effect of corticosterone on standard metabolic rates of small passerine birds. *Journal of Comparative Physiology B: Biochemical, Systemic, and Environmental Physiology* **161**, 427-431.
- Chappell, M. A., Shoemaker, V. H. and Janes, D. N. (1993). Energetics of foraging in breeding Adélie penguins. *Ecology* **74**, 2450-2461.
- Drent, R. H. and Daan, S. (1980). The prudent parent: energetic adjustments in avian breeding. *ARDEA* **68**, 225-252.
- Frankel, T. L. and Smith, P. (1998). Fish sausages prove to be unsuitable for determining minimum protein requirements of the little penguin (*Eudyptula minor*). *Proceedings of the Comparative Nutrition Society* **1**, 59-62.
- Frappell, P. B., Blevin, H. A. and Baudinette, R. V. (1989). Understanding Respirometry Chambers: What Goes in Must Come Out. *Journal of Theoretical Biology* **138**, 479-494.
- Frappell, P. B., Lanthier, C., Baudinette, R. V. and Mortola, J. P. (1992). Metabolism and ventilation in acute hypoxia: a comparative analysis in a small mammalian species. *American Journal of Physiology* **262**, R1040-R1046.
- Gales, R. and Green, B. (1990). The annual energetics cycle of little penguins *Eudyptula minor*. *Ecology* **71**, 2297-2312.
- Gales, R., Green, B., Libke, J., Newgrain, K. and Pemberton, D. (1993). Breeding energetics and food requirements of gentoo penguins (*Pygoscelis papua*) at Heard and Macquarie Islands. *Journal of Zoology* **231**, 125-139.
- Green, J. A. (2011). The heart rate method for estimating metabolic rate: review and recommendations. *Comparative Biochemistry and Physiology - Part A: Molecular & Integrative Physiology* **158**, 287-304.
- Green, J. A., Boyd, I. L., Woakes, A. J., Green, C. J. and Butler, P. J. (2005a). Do seasonal changes in metabolic rate facilitate changes in diving behaviour? *Journal of Experimental Biology* **208**, 2581-2593.
- Green, J. A., Boyd, I. L., Woakes, A. J., Green, C. J. and Butler, P. J. (2007). Feeding, fasting and foraging success during chick-rearing in macaroni penguins. *Marine Ecology Progress Series* **346**, 299-312.
- Green, J. A., Boyd, I. L., Woakes, A. J., Warren, N. L. and Butler, P. J. (2009a). Evaluating the prudence of parents: daily energy expenditure throughout the annual cycle of a free-ranging bird *Journal of Avian Biology* **40**, 529-538.
- Green, J. A., Butler, P. J., Woakes, A. J. and Boyd, I. L. (2002). Energy requirements of female macaroni penguins breeding at South Georgia. *Functional Ecology* **16**, 671-681.
- Green, J. A., Butler, P. J., Woakes, A. J., Boyd, I. L. and Holder, R. L. (2001). Heart rate and rate of oxygen consumption of exercising macaroni penguins. *Journal of Experimental Biology* **204**, 673-684.
- Green, J. A., Frappell, P. B., Clark, T. D. and Butler, P. J. (2006). Physiological response to feeding in little penguins. *Physiological and Biochemical Zoology* **79**, 1088-1097.
- Green, J. A., Halsey, L. G., Wilson, R. P. and Frappell, P. B. (2009b). Estimating energy expenditure of animals using the accelerometry technique: activity, inactivity and comparison with the heart rate technique. *Journal of Experimental Biology* **212**, 471-482.

- Green, J. A., White, C. R., Bunce, A., Frappell, P. B. and Butler, P. J. (2009c). Energetic consequences of plunge diving in gannets. *Endangered Species Research* **10**, 269-279.
- Green, J. A., Woakes, A. J., Boyd, I. L. and Butler, P. J. (2005b). Cardiovascular adjustments during locomotion in penguins. *Canadian Journal of Zoology* **83**, 445-454.
- Grémillet, D. (1997). Catch per unit effort, foraging efficiency, and parental investment in breeding great cormorants (*Phalacrocorax carbo carbo*). *ICES Journal of Marine Science* **54**, 635-644.
- Grémillet, D. J. H., Schmid, D. and Culik, B. M. (1995). Energy requirements of breeding great cormorants *Phalacrocorax carbo sinensis*. *Marine Ecology Progress Series* **121**, 1-9.
- Guillemette, M. and Butler, P. J. (2012). Seasonal variation in energy expenditure is not related to activity level or water temperature in a large diving bird. *The Journal of Experimental Biology* **215**, 3161-3168.
- Guillemette, M., Pelletier, D., Grandbois, J.-M. and Butler, P. J. (2007). Flightlessness and the energetic cost of wing molt in a large sea duck. *Ecology* **88**, 2936-2945.
- Halsey, L. G., Fahlman, A., Handrich, Y., Schmidt, A., Woakes, A. J. and Butler, P. J. (2007). How accurately can we estimate energetic costs in a marine top predator, the king penguin? *Zoology* **110**, 81-92.
- Hulbert, A. J. and Else, P. L. (2004). Basal metabolic rate: history, composition, regulation and usefulness. *Physiological and Biochemical Zoology* **77**, 869-876.
- Jodice, P. G. R., Roby, D. D., Suryan, R. M., Irons, D. B., Kaufman, A. M., Turco, K. R. and Visser, G. H. (2003). Variation in energy expenditure among black-legged kittiwakes: effects of activity-specific metabolic rates and energy budgets. *Physiological and Biochemical Zoology* **76**, 375-388.
- Kitaysky, A. S., Wingfield, J. C. and Piatt, J. F. (1999). Dynamics of food availability, body condition and physiological stress response in breeding Black-legged Kittiwakes. *Functional Ecology* **13**, 577-584.
- Laugksch, R. C. and Duffy, D. C. (1986). Food transit rates in cape gannets and jackass penguins. *The Condor* **88**, 117-119.
- Lescroël, A., Ballard, G., Toniolo, V., Barton, K. J., Wilson, P. R., Lyver, P. O. B. and Ainley, D. G. (2010). Working less to gain more: when breeding quality relates to foraging efficiency. *Ecology* **91**, 2044-2055.
- Lormée, H., Jouventin, P., Trouve, C. and Chastel, O. (2003). Sex-specific patterns in baseline corticosterone and body condition changes in breeding Red-footed Boobies *Sula sula*. *Ibis* **145**, 212-219.
- McKechnie, A. (2008). Phenotypic flexibility in basal metabolic rate and the changing view of avian physiological diversity: a review. *Journal of Comparative Physiology B: Biochemical, Systemic, and Environmental Physiology* **178**, 235-247.
- McNab, B. K. (1997). On the utility of uniformity in the definition of basal rate of metabolism. *Physiological Zoology* **70**, 718-720.
- McNab, B. K. (2009). Ecological factors affect the level and scaling of avian BMR. *Comparative Biochemistry and Physiology - Part A: Molecular & Integrative Physiology* **152**, 22-45.
- Moreno, J. and Sanz, J. J. (1996). Field metabolic rates of breeding chinstrap penguins (*Pygoscelis antarctica*) in the South Shetlands. *Physiological Zoology* **69**, 586-598.
- Mullers, R. H. E., Navarro, R. A., Daan, S., Tinbergen, J. M. and Meijer, Harro A. J. (2009). Energetic costs of foraging in breeding Cape gannets *Morus capensis*. *Marine Ecology Progress Series* **393**, 161-171.



- 670 **Palokangas, R. and Hissa, R.** (1971). Thermoregulation in young black-headed  
671 gull (*Larus ridibundus* L.). *Comparative Biochemistry and Physiology Part A: Physiology*  
672 **38**, 743-750.
- 673 **Portugal, S. J., Green, J. A., Cassey, P., Frappell, P. B. and Butler, P. J.** (2009).  
674 Predicting the rate of oxygen consumption from heart rate in barnacle geese *Branta*  
675 *leucopsis*: Effects of captivity and annual changes in body condition. *Journal of*  
676 *Experimental Biology* **212**, 2941-2948.
- 677 **Ricklefs, R. E.** (1983). Some considerations on the reproductive energetics of  
678 pelagic seabirds. *Studies in Avian Biology* **8**, 84-94.
- 679 **Ricklefs, R. E., Konarzewski, M. and Daan, S.** (1996). The Relationship between  
680 Basal Metabolic Rate and Daily Energy Expenditure in Birds and Mammals. *The American*  
681 *Naturalist* **147**, 1047-1071.
- 682 **Shaffer, S. A.** (2004). Annual energy budget and food requirements of breeding  
683 wandering albatrosses (*Diomedea exulans*). *Polar Biology* **27**, 253-256.
- 684 **Shaffer, S. A., Costa, D. P. and Weimerskirch, H.** (2003). Foraging effort in  
685 relation to the constraints of reproduction in free-ranging albatrosses. *Functional Ecology*  
686 **17**, 66-74.
- 687 **Smit, B. and McKechnie, A. E.** (2010). Avian seasonal metabolic variation in a  
688 subtropical desert: basal metabolic rates are lower in winter than in summer. *Functional*  
689 *Ecology* **24**, 330-339.
- 690 **Steiger, Silke S., Kelley, J. P., Cochran, William W. and Wikelski, M.** (2009).  
691 Low metabolism and inactive lifestyle of a tropical rain forest bird investigated via heart  
692 rate telemetry. *Physiological and Biochemical Zoology* **82**, 580-589.
- 693 **Sterne, J. A. C. and Smith, G. D.** (2001). Sifting the evidence—what's wrong with  
694 significance tests? *British Medical Journal* **322**, 226-231.
- 695 **Storch, S., Grémillet, D. and Culik, B. M.** (1999). The telltale heart: a non-invasive  
696 method to determine the energy expenditure of incubating great cormorants *Phalacrocorax*  
697 *carbo carbo*. *ARDEA* **87**, 207-215.
- 698 **Swanson, D. L.** (2010). Seasonal metabolic variation in birds: functional and  
699 mechanistic correlates. *Current Ornithology* **17**, 75-129.
- 700 **Swanson, David L. and Olmstead, Karen L.** (1999). Evidence for a proximate  
701 influence of winter temperature on metabolism in passerine birds. *Physiological and*  
702 *Biochemical Zoology* **72**, 566-575.
- 703 **Takahashi, A., Watanuki, Y., Sato, K., Kato, A., Aral, N., Nishikawa, J. and**  
704 **Naito, Y.** (2003). Parental foraging effort and offspring growth in Adélie Penguins: does  
705 working hard improve reproductive success? *Functional Ecology* **17**, 590-597.
- 706 **Ward, S., Bishop, C. M., Woakes, A. J. and Butler, P. J.** (2002). Heart rate and  
707 the rate of oxygen consumption of flying and walking barnacle geese (*Branta leucopsis*)  
708 and bar-headed geese (*Anser indicus*). *Journal of Experimental Biology* **205**, 3347-3356.
- 709 **Welcker, J., Moe, B., Bech, C., Fyhn, M., Schultner, J., Speakman, J. R. and**  
710 **Gabrielsen, G. W.** (2010). Evidence for an intrinsic energetic ceiling in free-ranging  
711 kittiwakes *Rissa tridactyla*. *Journal of Animal Ecology* **79**, 205-213.
- 712 **White, C. R., Blackburn, T. M., Martin, G. R. and Butler, P. J.** (2007). Basal  
713 metabolic rate of birds is associated with habitat temperature and precipitation, not primary  
714 productivity. *Proceedings of the Royal Society B: Biological Sciences* **274**, 287-293.
- 715 **White, C. R., Cassey, P., Schimpf, N. G., Halsey, L. G., Green, J. A. and**  
716 **Portugal, S. J.** (2013). Implantation reduces the negative effects of bio-logging devices on  
717 birds. *Journal of Experimental Biology* **In Press**.
- 718 **White, C. R., Grémillet, D., Green, J. A., Martin, G. R. and Butler, P. J.** (2011).  
719 Measuring field metabolic rate in free-living great cormorants reveals the true demands of  
720 an Arctic existence. *Ecology* **92**, 475-486.
- 721

| Bird         | <i>Inactive</i> |              |     | <i>Active</i> |              |    |
|--------------|-----------------|--------------|-----|---------------|--------------|----|
|              | $f_H$           | $\dot{V}O_2$ | n   | $f_H$         | $\dot{V}O_2$ | n  |
| 1            | 111 ± 1.4       | 26.8 ± 0.51  | 273 | 236 ± 9.4     | 92.3 ± 5.39  | 10 |
| 2            | 94 ± 0.8        | 24.5 ± 0.35  | 670 | 163 ± 8.2     | 80.4 ± 12.74 | 5  |
| 3            | 91 ± 1.2        | 25.9 ± 0.44  | 697 | 136 ± 5.3     | 89.1 ± 5.36  | 23 |
| 4            | 70 ± 0.6        | 36.0 ± 0.78  | 546 | 207 ± 7.9     | 100.9 ± 6.27 | 25 |
| 5            | 89 ± 0.8        | 17.2 ± 0.26  | 503 | 206 ± 36.3    | 74.0 ± 5.02  | 3  |
| 6            | 85 ± 0.6        | 17.0 ± 0.19  | 697 | 180 ± 11.5    | 79.5 ± 3.22  | 13 |
| 7            | 79 ± 0.5        | 15.2 ± 0.19  | 662 | 137 ± 4.7     | 62.2 ± 4.07  | 27 |
| 8            | 102 ± 0.8       | 19.2 ± 0.25  | 576 | 182 ± 5.4     | 49.6 ± 4.00  | 33 |
| Mean (± SEM) | 90 ± 5          | 22.7 ± 2.46  |     | 181 ± 12      | 78.5 ± 5.86  |    |

725

726 Table 1. Mean (± S.E.M.) heart rate ( $f_H$ ) and rate of oxygen consumption ( $\dot{V}O_2$ ) while eight  
727 Australasian gannets in the laboratory were inactive (resting for 36 hours) or active  
728 (walking on a treadmill at different speeds). Values of n refer to the number of three minute  
729 periods spent inactive or active.

730

731

|                                      | <i>Laboratory</i> |            |            | <i>Free-ranging</i> |              |            | <i>Free-ranging/Laboratory</i> |     |
|--------------------------------------|-------------------|------------|------------|---------------------|--------------|------------|--------------------------------|-----|
|                                      | Night             | Day        | % Increase | Night               | Day          | % Increase | Night                          | Day |
| $f_H$ (beats min <sup>-1</sup> )     | 81 ± 5            | 102 ± 6    | 28 ± 5     | 179 ± 11            | 219 ± 8      | 24 ± 6     | 2.2                            | 2.1 |
| $\dot{V}O_2$ (ml min <sup>-1</sup> ) | 18.9 ± 1.9        | 27.1 ± 3.3 | 42 ± 7     | 60.5 ± 6.6          | 112.6 ± 13.1 | 97 ± 27    | 3.2                            | 4.1 |
| $T_b$ (°C)                           | 37.2 ± 0.1        | 38.4 ± 0.3 | 3.4 ± 0.5  |                     |              |            |                                |     |

Table 2. Variation in mean (± SEM) heart rate ( $f_H$ ), rate of oxygen consumption ( $\dot{V}O_2$ ) and body temperature ( $T_b$ ) between day and night of Australasian gannets while resting in the laboratory (n=8) or free-ranging in the field (n=5) in late January and early February. Field estimates of  $\dot{V}O_2$  (± SEE) were made using a calibration relationship between  $f_H$  and  $\dot{V}O_2$  (Fig. 1).



738  
739

| Variable | <i>F</i> | <i>P</i> | <i>r</i> <sup>2</sup> |
|----------|----------|----------|-----------------------|
| FMR      | 10.1     | 0.01     | 0.53                  |
| NMR      | 3.29     | 0.10     | 0.27                  |
| MMR      | 56.0     | <0.001   | 0.86                  |
| DTF      | 1.3      | 0.29     | 0.12                  |
| DTS      | 1.8      | 0.22     | 0.16                  |
| DND      | 0.0      | 0.96     | 0.00                  |

740  
741  
742  
743  
744  
745

Table 3. Statistical parameters for weighted regression relationships between time since 1<sup>st</sup> September and variables relating to Australasian gannet energetics (FMR; field metabolic rate, NMR; net metabolic rate, MMR; minimum metabolic rate) and behaviour (DTF; daily time in flight, DTS; daily time submerged, DND; daily number of dives).

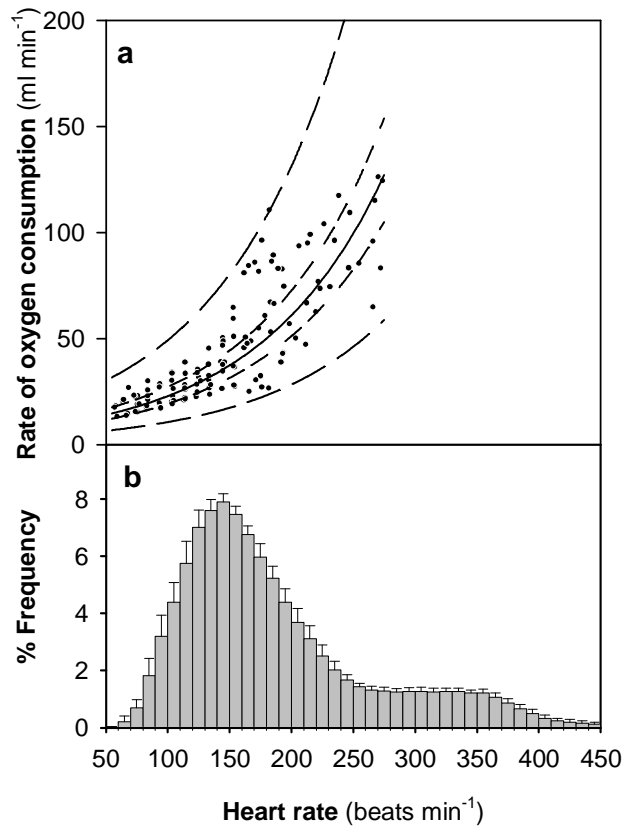

Figure 1. (a) Calibration relationship between heart rate ( $f_H$ ) and rate of oxygen consumption ( $\dot{V}O_2$ ) in eight Australasian gannets and (b) distribution of mean heart rate (calculated every three minutes) measured in six free-ranging Australasian gannets. The range of heart rates used in the calibration procedure encompasses 85% of those observed in the free-ranging gannets. Data were obtained while birds rested and walked on a treadmill. In panel (a), each data point represents the mean values of  $f_H$  and  $\dot{V}O_2$  calculated for bins of 10 beats  $\text{min}^{-1}$  for each bird. The solid line shows the regression line through these data points, weighted by the square root of the number of points used to calculate each mean ( $\dot{V}O_2 = 8.58e^{0.0098f_H}$ ,  $r^2 = 0.89$ ,  $P < 0.001$ ). Short dashed lines are 95% prediction intervals. Long dashed lines are 95% confidence intervals. Parameters required to calculate the confidence intervals are as follows: number of individuals = 8, number of data points = 131, standard error of slope estimate = 0.000334, mean  $f_H$  during calibration = 146.1, variance component for individuals = 0.02957, variance component for error = 0.11287.

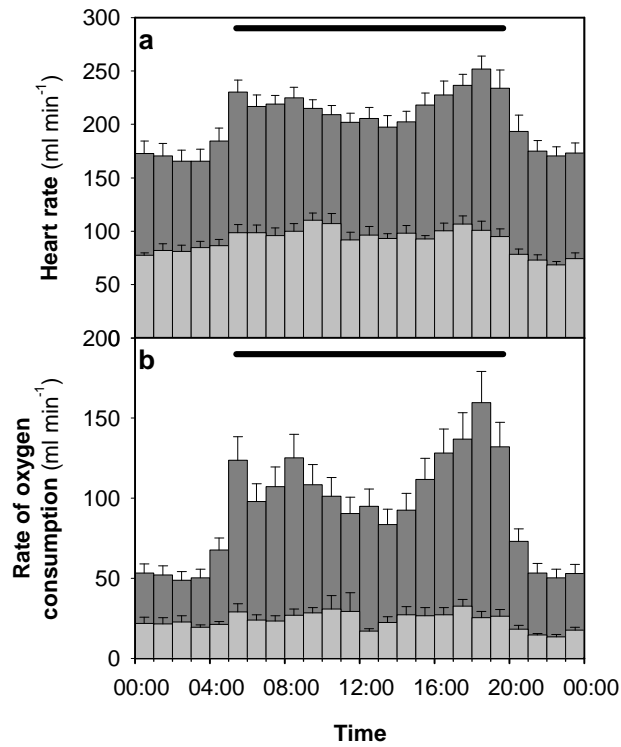

Figure 2. Diel variation in mean ( $\pm$  SEM/SEE) (a) Heart rate and (b) rate of oxygen consumption ( $\dot{V}O_2$ ) of Australasian gannets while in the laboratory (light grey bars, n=8) or free-ranging in the field (dark grey bars, n=5) from mid January to early February (11/1 – 7/2). Field estimates of  $\dot{V}O_2$  ( $\pm$  SEE) were made using a calibration relationship between  $f_H$  and  $\dot{V}O_2$  (Figure 1). The black bar represents the mean duration of daylight for the study period.

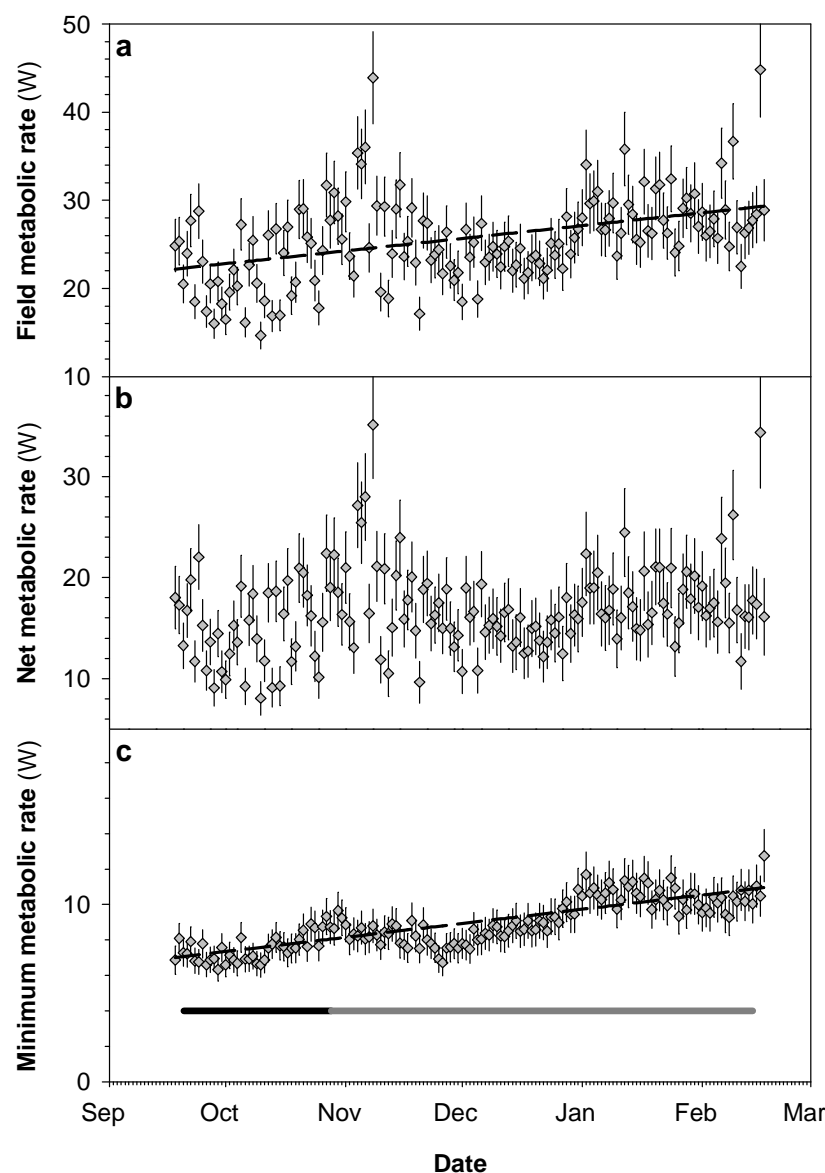

Figure 3. Estimated mean ( $\pm$  SEE) (a) daily field metabolic rate (b) net metabolic rate and (c) minimum metabolic rate of free-ranging Australasian gannets ( $n=6$ ) for each day of the 2004/05 breeding season. Dashed lines show significant linear regression relationships between date and metabolic rate. The timing and duration of the incubation and chick-rearing phases of the study animals are indicated by the black and grey bars in the lowest panel.

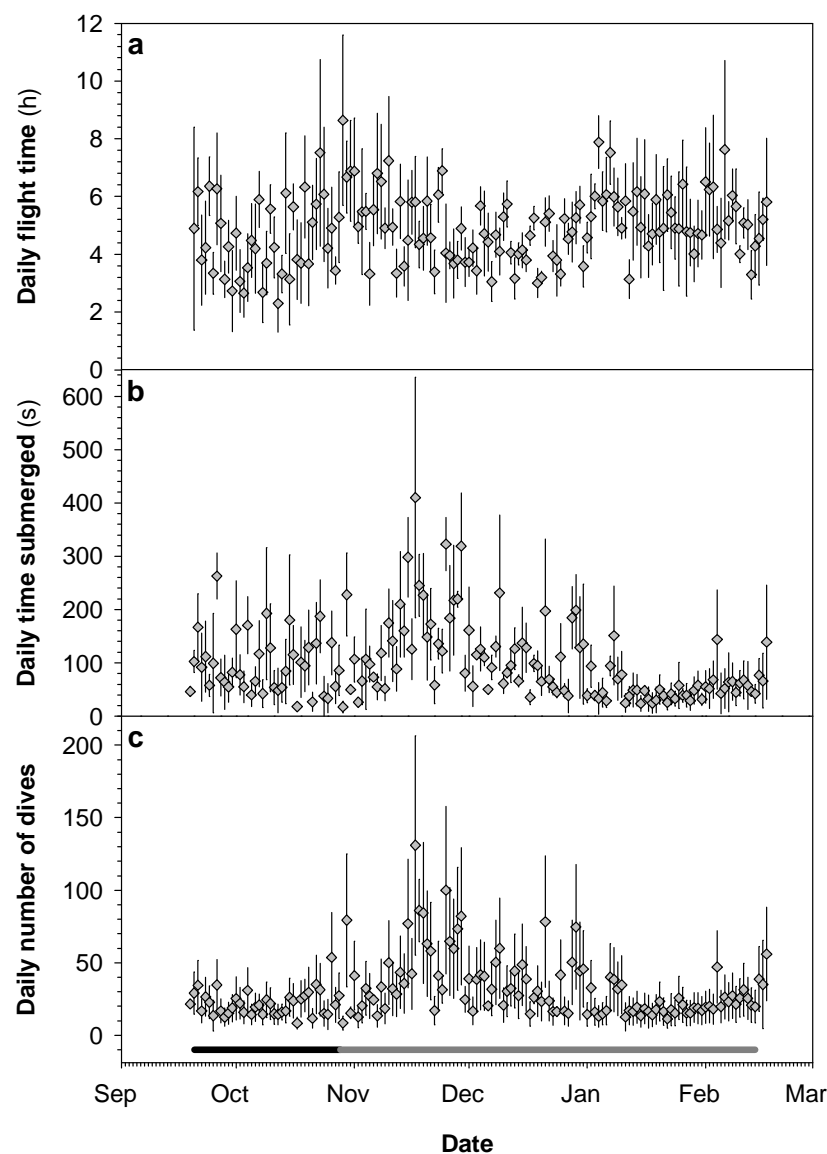

Figure 4. Mean ( $\pm$  SEM) (a) time spent in flight (b) time spent submerged and (c) number of dives by free-ranging Australasian gannets ( $n=4$ ) for each day of the 2004/05 breeding season. The timing and duration of the incubation and chick-rearing phases of the study animals are indicated by the black and grey bars in the lowest panel.
